# Supplementary material for: Reactions of phosphinites with oxide surfaces: a new method for anchoring organic and organometallic complexes
Source: Royal Society of Chemistry journal article supplement (doi:10.1039/c0dt01369b), 2011-01-01
Supplement: c0dt01369b.pdf [file c0dt01369b.pdf]

## Reactions of Phosphinites with Alumina and Silica:

### A New Method for Anchoring Organic and Organometallic Complexes on Oxide Surfaces

Brian C. Vicente, Zheng Huang, Maurice Brookhart, Alan S. Goldman, and Susannah L. Scott

#### Table of Contents

|                                                                                                                                                                        | <b>Page</b> |
|------------------------------------------------------------------------------------------------------------------------------------------------------------------------|-------------|
| <b>Figure S1</b> $^{31}\text{P}\{^1\text{H}\}$ NMR spectrum (THF- $d_8$ ) of products extracted by THF from ( <i>t</i> -Bu) $_2$ (PhO)P supported on alumina           | <b>S2</b>   |
| <b>Figure S2</b> $^1\text{H}$ NMR spectrum (THF- $d_8$ ) of products extracted by THF from ( <i>t</i> -Bu) $_2$ (PhO)P supported on alumina                            | <b>S3</b>   |
| <b>Figure S3</b> GC/MS analysis of soluble species extracted by water from ( <i>t</i> -Bu) $_2$ (OPh)P supported on alumina                                            | <b>S4</b>   |
| <b>Figure S4</b> Solid-state $^{31}\text{P}$ MAS NMR spectrum of partially oxidized 1,3,5-(( <i>t</i> -Bu) $_2$ PO) $_3$ -C $_6$ H $_3$ supported on $\gamma$ -alumina | <b>S5</b>   |

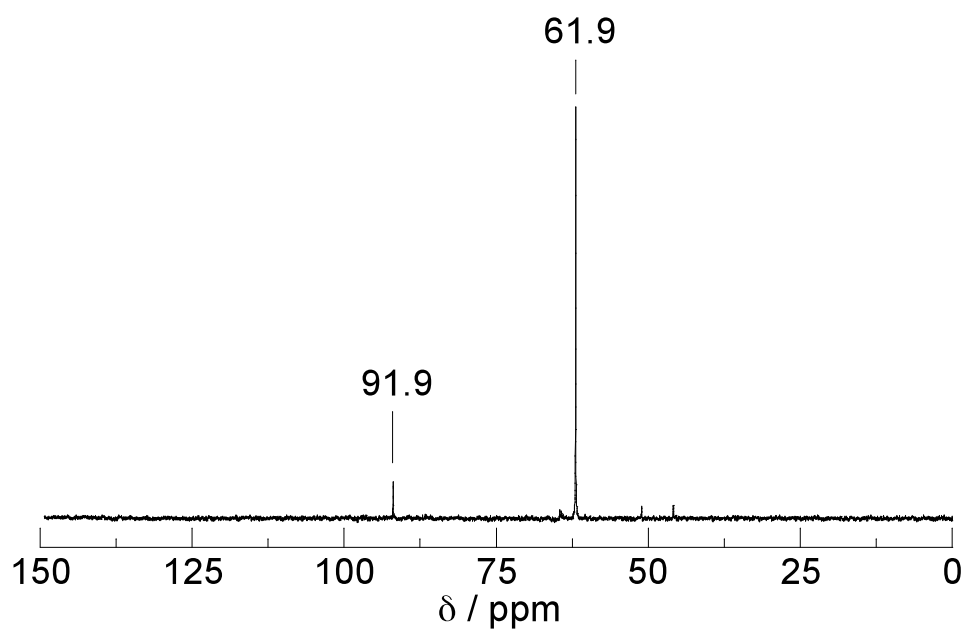

**Figure S1.** Solution-state  $^{31}\text{P}\{^1\text{H}\}$  NMR spectrum ( $\text{THF-}d_8$ ) of products extracted by THF from  $(t\text{-Bu})_2(\text{PhO})\text{P}$  (phenyl di-*tert*-butylphosphinite) supported on  $\gamma$ -alumina.

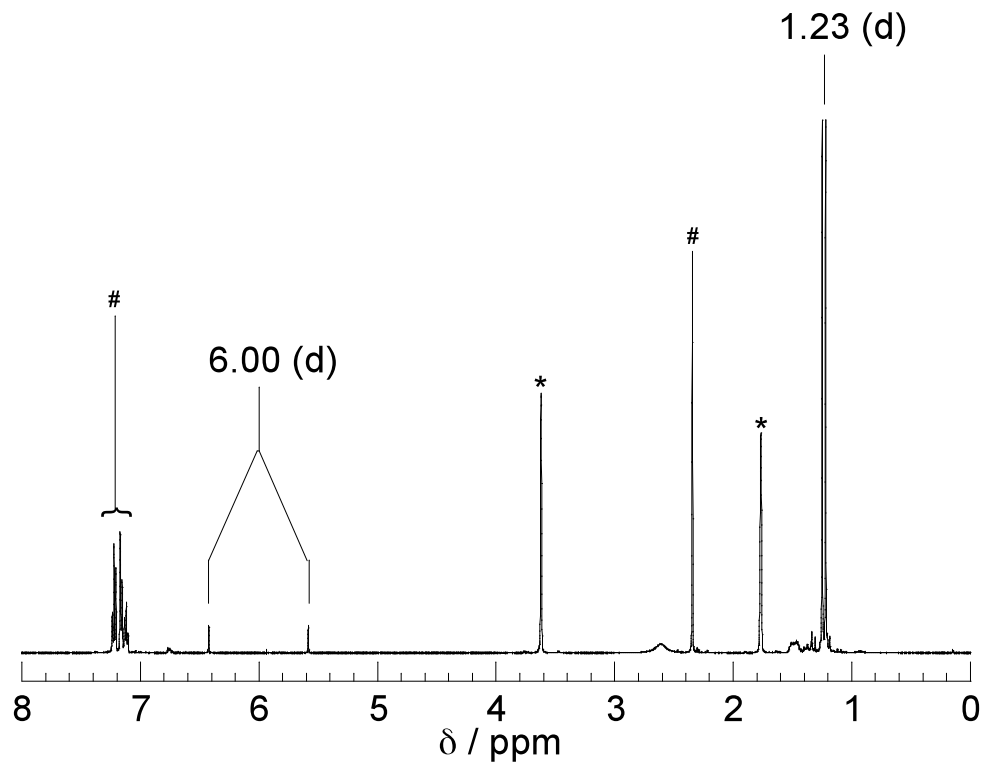

**Figure S2.**  $^1\text{H}$  NMR spectrum ( $\text{THF-}d_8$ ) of the product extracted from  $(t\text{-Bu})_2(\text{PhO})\text{P}$  supported on  $\gamma$ -alumina. THF signals are indicated with \*. Signals at 7.08 - 7.24 ppm and the singlet at 2.34 ppm, indicated with #, are assigned to residual toluene, the solvent used to support the phosphinite on  $\gamma$ -alumina.

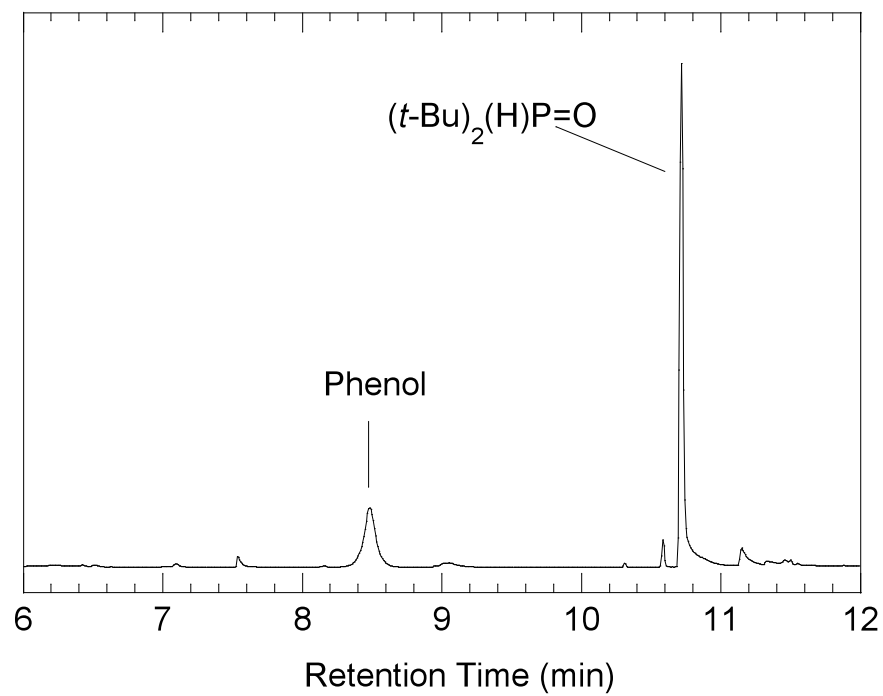

**Figure S3.** GC/MS trace of water washings of  $(t\text{-Bu})_2(\text{PhO})\text{P}$  supported on  $\gamma$ -alumina

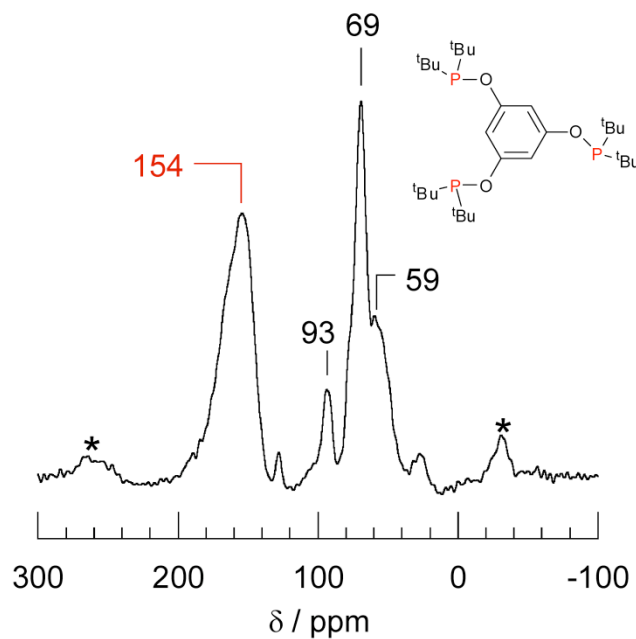

**Figure S4.** Solid-state  $^{31}\text{P}$  MAS NMR spectra of partially oxidized 1,3,5- $((t\text{-Bu})_2\text{PO})_3\text{-C}_6\text{H}_3$  adsorbed on  $\gamma$ -alumina. Partial oxidation was achieved by exposing 1,3,5- $((t\text{-Bu})_2\text{PO})_3\text{-C}_6\text{H}_3$  to air prior to its adsorption on  $\gamma$ -alumina. The spectrum was recorded with 12 kHz MAS; asterisks denote spinning sidebands
